# Supplementary material
Source: Springer Nature journal article supplement (https://www.springermedizin.de/resource/supplementary/12911_2012_770_MOESM8_ESM.pdf/9526286)
Supplement: MOESM8 [file 9526286]

**Control Chart**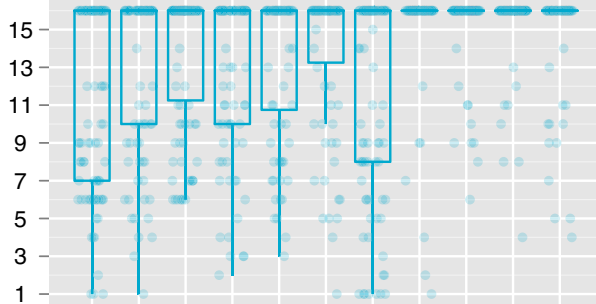**Surveillance Tree**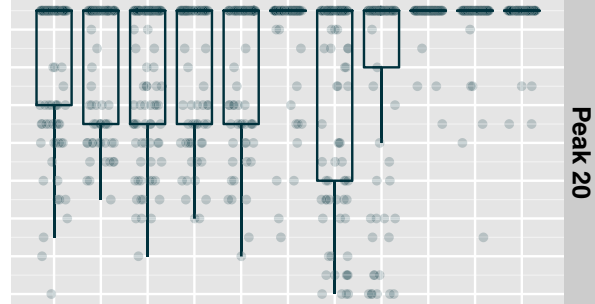

Time-to-Signal

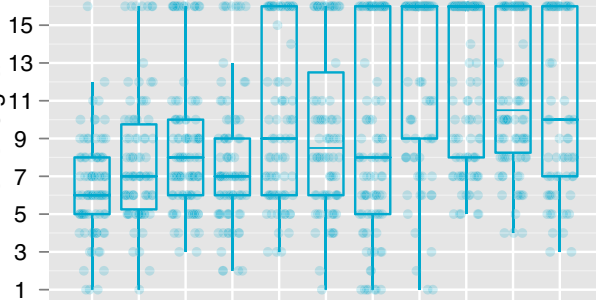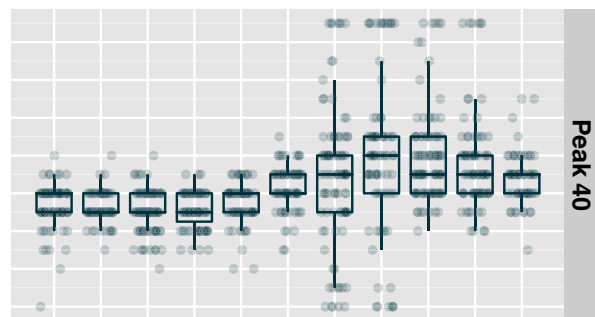

Peak 40

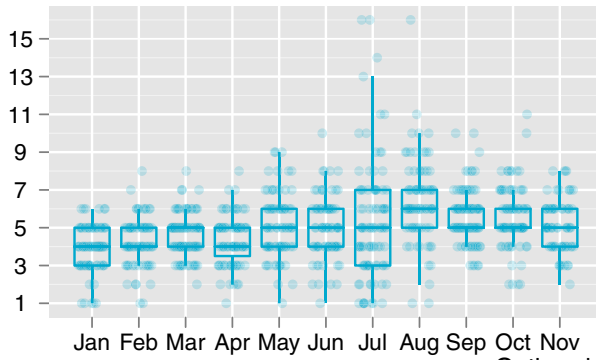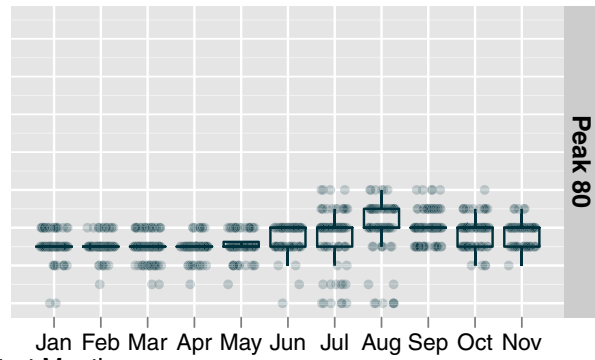

Peak 80

Jan Feb Mar Apr May Jun Jul Aug Sep Oct Nov  
Outbreak Start Month

Jan Feb Mar Apr May Jun Jul Aug Sep Oct Nov
